# **Pharmacists' Perspectives on Implementing Pharmacist-Managed Anticoagulant Clinics in Makkah Region Ministry of Health Hospitals: A Qualitative Study**

## **Supplementary file 1. Participant's Interview Guide.**

### **1- Opening of the interview**

- Greet the participants and thank them for taking part in the research.
- Explain again the purpose of the study.
- Ask participants if they would like to ask any questions before starting the interview.
- Emphasize to the participants that there is no right or wrong answer and that I am just interested in their experiences.
- Discuss the participants' information sheet if they have not read it beforehand.
- Discuss the participant's informed consent and ensure it is signed.
- Check the audio recorder and ask the participants if they are happy to begin the interview.

#### **Before we start this interview, I would like to confirm that:**

- Your participation in this study is completely voluntary.
- You are free to refuse to answer any question.
- You can withdraw, but only up to the interview's conclusion.
- The interview will be strictly confidential and anonymized, and all information disclosed during the interview will be only available to the research team.
- Excerpts from this interview may be part of the final report of the project. However, the information in the project report will NOT be linked to you.
- All reports and information collected will be stored securely at Umm Al-Qura University.

#### **Are you ready to proceed with the interview?**

### **2- Body of the interview and research questions**

The research will be "*Exploring Barriers and Facilitators of Implementing Pharmacists-led Anticoagulants Clinics at Ministry of Health Hospitals in Makkah Region: A Qualitative Study*". The participants will be introduced to what I mean by "barriers and facilitators of implementing anticoagulant pharmacy clinic".

The interview will consist of four parts, questions for each group of participants (pharmacy leaders, clinical pharmacists, pharmacists), which are:

- a. Knowledge of the anticoagulant pharmacy clinic.
- b. Implementation process of anticoagulant pharmacy clinic in Makkah region.
- c. Barriers to implementing anticoagulant pharmacy clinic in Makkah region.
- d. Facilitators to implementing anticoagulant pharmacy clinic in Makkah region.

| Interview Part                                        | If an anticoagulant clinic is implemented                                                                                                                                                                                                                                                                                                                                                                      | If an anticoagulant clinic is NOT implemented                                                                                                                                                                                                                                                                                                                                                                                                                                                                                                                                                                                                                                                                                                                                                                                                                                                                                                                                                                                                                                                     |
|-------------------------------------------------------|----------------------------------------------------------------------------------------------------------------------------------------------------------------------------------------------------------------------------------------------------------------------------------------------------------------------------------------------------------------------------------------------------------------|---------------------------------------------------------------------------------------------------------------------------------------------------------------------------------------------------------------------------------------------------------------------------------------------------------------------------------------------------------------------------------------------------------------------------------------------------------------------------------------------------------------------------------------------------------------------------------------------------------------------------------------------------------------------------------------------------------------------------------------------------------------------------------------------------------------------------------------------------------------------------------------------------------------------------------------------------------------------------------------------------------------------------------------------------------------------------------------------------|
| <b>Knowledge of the anticoagulant pharmacy clinic</b> | <ol style="list-style-type: none"> <li>1. How long have you known about the anticoagulant pharmacy clinic?</li> <li>2. How well do you know the pharmacist's role in managing anticoagulant medication?<br/><b>Prompt:</b><br/>- What service could the pharmacists provide to the patients in the clinics?</li> <li>3. How do you perceive the potential impact of the clinic on patient outcomes?</li> </ol> | <ol style="list-style-type: none"> <li>1. Have you heard of the anticoagulant pharmacy clinic?</li> <li>2. <b>If the answer is (Yes)</b>, How well do you know about the pharmacist's role in managing anticoagulant medication?<br/><b>Prompt:</b><br/>- What services could the pharmacists provide to the patients in the clinics?</li> <li>3. <b>If the answer is (No)</b>, In your opinion, what could be the role of pharmacists in managing patients taking anticoagulants medication?<br/><b>Prompt:</b><br/>- How do you think pharmacists can provide help to patients taking anticoagulants?</li> <li>4. How do you perceive the potential impact of the clinic on patient outcomes?<br/><b>Prompt:</b><br/>- Or they do not need it because they receive enough information form their physicians?</li> <li>5. Since studies support the positive outcomes of implementing the clinic, how long do you expect to establish the clinic in your hospital?<br/><b>Prompt:</b><br/>- Are you aware of any MOH plans to Implement the clinic in the hospitals of Makkah region?</li> </ol> |

|                                      |                                                                                                                                                                                                                                                                                                                                                                                                                                                                                                                                                                                                                                                                                                                                                                                                                                                                                                                                                                                                                                                                                                                                                                                                                                                                                                                                                                                                                                                                                                                                                |                                                                                                                                                                                                                                                                                                                                                                                                                                                                                                                                                                                                                                                                                                                                                                                                                                                                                                                                                                                                                                                                                                                                                                                                  |
|--------------------------------------|------------------------------------------------------------------------------------------------------------------------------------------------------------------------------------------------------------------------------------------------------------------------------------------------------------------------------------------------------------------------------------------------------------------------------------------------------------------------------------------------------------------------------------------------------------------------------------------------------------------------------------------------------------------------------------------------------------------------------------------------------------------------------------------------------------------------------------------------------------------------------------------------------------------------------------------------------------------------------------------------------------------------------------------------------------------------------------------------------------------------------------------------------------------------------------------------------------------------------------------------------------------------------------------------------------------------------------------------------------------------------------------------------------------------------------------------------------------------------------------------------------------------------------------------|--------------------------------------------------------------------------------------------------------------------------------------------------------------------------------------------------------------------------------------------------------------------------------------------------------------------------------------------------------------------------------------------------------------------------------------------------------------------------------------------------------------------------------------------------------------------------------------------------------------------------------------------------------------------------------------------------------------------------------------------------------------------------------------------------------------------------------------------------------------------------------------------------------------------------------------------------------------------------------------------------------------------------------------------------------------------------------------------------------------------------------------------------------------------------------------------------|
| <p><b>Implementation process</b></p> | <p><b>Since the clinic is established in your hospital:</b></p> <ol style="list-style-type: none"> <li>1. When was the anticoagulant pharmacy clinic service applied?</li> <li>2. What was the necessity to establish the clinic in your hospital?<br/><b>Prompt:</b> <ul style="list-style-type: none"> <li>- Did patients need to have the clinic? (e.g., to improve INR, reduce side effects)</li> <li>- Does the clinic impact on the patient's outcomes? What are the outcomes? (e.g., quality of life, Hospital re-admission rate, Medication adherence)</li> <li>- Considering the physician practices and their number at your hospitals, did they need to establish such a clinic?</li> </ul> </li> <li>3. What is your experience of implementing the clinic?<br/><b>Prompt:</b> <ul style="list-style-type: none"> <li>- What was the idea of applying the clinic?</li> <li>- Who came up with the idea (from pharmacy staff, leader, or physician)?</li> <li>- How was the clinic planned to open? (step or process of opening it).</li> </ul> </li> <li>4. How do you think the MOH policy would affect the clinic's implementation process?</li> <li>5. How many specialized or trained pharmacists do/did you have at your hospital, who can manage the clinic?</li> <li>6. What are the resources that were relied upon during the implementation of the clinic?<br/><b>Prompt:</b> <ul style="list-style-type: none"> <li>- Have you ever had a copy of policy specifications, training, or workshops?</li> </ul> </li> </ol> | <p><b>Since you are working at an MOH hospital, and the clinic is not implemented:</b></p> <ol style="list-style-type: none"> <li>1. Do you need such a clinic at your hospital?</li> <li>2. What is the necessity of establishing the clinic in your hospital?<br/><b>Prompt:</b> <ul style="list-style-type: none"> <li>- Do patients need to have the clinic? (e.g., to improve INR, reduce side effects)</li> <li>- Does the clinic impact on the patient's outcomes? What are the outcomes? (e.g., quality of life, Hospital re-admission rate, Medication adherence)</li> <li>- Considering the physician practices and their number at your hospitals, do they need to establish such a clinic?</li> </ul> </li> <li>3. How do you think the MOH policy would affect the clinic' implementation process?</li> <li>4. Do you have a specialized or trained pharmacist at your hospital who can manage the clinic? How many?</li> <li>5. What are the resources that could you rely upon to establish the clinic?<br/><b>Prompt:</b> <ul style="list-style-type: none"> <li>- Do you need a copy of the policy specification, and training on how to run the clinic?</li> </ul> </li> </ol> |
|--------------------------------------|------------------------------------------------------------------------------------------------------------------------------------------------------------------------------------------------------------------------------------------------------------------------------------------------------------------------------------------------------------------------------------------------------------------------------------------------------------------------------------------------------------------------------------------------------------------------------------------------------------------------------------------------------------------------------------------------------------------------------------------------------------------------------------------------------------------------------------------------------------------------------------------------------------------------------------------------------------------------------------------------------------------------------------------------------------------------------------------------------------------------------------------------------------------------------------------------------------------------------------------------------------------------------------------------------------------------------------------------------------------------------------------------------------------------------------------------------------------------------------------------------------------------------------------------|--------------------------------------------------------------------------------------------------------------------------------------------------------------------------------------------------------------------------------------------------------------------------------------------------------------------------------------------------------------------------------------------------------------------------------------------------------------------------------------------------------------------------------------------------------------------------------------------------------------------------------------------------------------------------------------------------------------------------------------------------------------------------------------------------------------------------------------------------------------------------------------------------------------------------------------------------------------------------------------------------------------------------------------------------------------------------------------------------------------------------------------------------------------------------------------------------|

|                                                             |                                                                                                                                                                                                                                                                                                                                                                                                                                                                                                                                                                                                                                               |                                                                                                                                                                                                                                                                                                                                                                                                                                                                                                                                                                                        |
|-------------------------------------------------------------|-----------------------------------------------------------------------------------------------------------------------------------------------------------------------------------------------------------------------------------------------------------------------------------------------------------------------------------------------------------------------------------------------------------------------------------------------------------------------------------------------------------------------------------------------------------------------------------------------------------------------------------------------|----------------------------------------------------------------------------------------------------------------------------------------------------------------------------------------------------------------------------------------------------------------------------------------------------------------------------------------------------------------------------------------------------------------------------------------------------------------------------------------------------------------------------------------------------------------------------------------|
| <p><b>Barriers of anticoagulant pharmacy clinic</b></p>     | <p>1. What are the barriers you faced while implementing the clinic or the <b>barriers/obstacles</b> that can stop running the clinic?<br/> <b>Prompt:</b><br/> - Have you ever faced any issues with providing the service? (technical problems, workload, laboratory issues and physician resistance).<br/><br/> - What is your opinion of the pharmacist’s knowledge and training to counsel the patients and run the clinic?<br/><br/> - What do you think about the availability of the resources to implement the clinic? Are they sufficient?<br/> e.g., staff shortage, time, rooms (space), computer, money (financial support).</p> | <p>1. In your perspective what are the <b>barriers</b> you will face while implementing the clinic?<br/> <b>Prompt:</b><br/> - Any issues with providing the service? (technical problems, workload, laboratory issues and physician resistance).<br/><br/> - What is your opinion of the pharmacist’s knowledge and training to counsel the patients and run the clinic?<br/><br/> - What do you think about the availability of the resources to implement the clinic? Are they sufficient?<br/> e.g., staff shortage, time, rooms (space), computer, money (financial support).</p> |
| <p><b>Facilitators of anticoagulant pharmacy clinic</b></p> | <p>1. What were the <b>facilitators</b> that supported the opening or the continuity of the clinic?<br/> <b>Prompt:</b><br/> What are the types of support you received? e.g.,<br/> - motivation,<br/> - organizational support (by head of hospital/MOH),<br/> - supportive leadership,<br/> - employing skilled staff,<br/> - providing training, workshops,<br/> - perceived effectiveness of the clinic (like good follow up results, patient satisfaction).</p>                                                                                                                                                                          | <p>1. What do you think the <b>facilitators</b> that would support the opening or the continuity of the clinic?<br/> <b>Prompt:</b><br/> What types of support would you need to implement the clinic in your hospital?<br/> - motivation,<br/> - organizational support (by head of hospital/MOH),<br/> - supportive leadership,<br/> - employing skilled staff,<br/> - providing training, workshops,<br/> - perceived effectiveness of the clinic (like good follow up results, patient satisfaction)</p>                                                                           |

**3- Closing the interview:**

- Ask the participants if they would like to add or ask about anything else before closing the audio recorder and finishing the interview.
- Thank the participant again for taking part in the study.
